# Supplementary material for: DISTORTIONAL EXTREMA AND HOLES IN THE GEOMETRIC MANIFOLD
Source: Research Square preprint supplement (doi:10.21203/rs.3.rs-767026/v1), 2021-08-02
Supplement: Supplementary file 1 [file 85bbe3f5d76f22e07b14868d.docx]

SIGuide.docx

Supplementary Equations

Riemann’s Geometric “Equation-set” and the resulting version when using the tensor equation-of-state restriction for the “energy-densities” is developed here. After a solution is found, the geometric Equation-set is expressed in the spherically symmetric radius dependent form for physical interpretation and elucidation.
